# Supplementary material for: Genome-wide identification and analysis of mitogen activated protein kinase kinase kinase gene family in grapevine (Vitis vinifera)
Source: PubMed Central journal article supplement (PMC4243721; doi:10.1186/s12870-014-0219-1), 2014-08-27
Supplement: 12870_2014_219_MOESM8_ESM.pdf [file 12870_2014_219_MOESM8_ESM.pdf]

|                      |      | E. necator treatment |              |               |               |               |               |               |               |               |               |               |               |               |               |               |               |               |               |               |               |               |               |               |               |               |               |               |               |               |               |               |               |               |               |               |               |               |               |               |               |               |               |               |               |               |
|----------------------|------|----------------------|--------------|---------------|---------------|---------------|---------------|---------------|---------------|---------------|---------------|---------------|---------------|---------------|---------------|---------------|---------------|---------------|---------------|---------------|---------------|---------------|---------------|---------------|---------------|---------------|---------------|---------------|---------------|---------------|---------------|---------------|---------------|---------------|---------------|---------------|---------------|---------------|---------------|---------------|---------------|---------------|---------------|---------------|---------------|---------------|
|                      |      | ViiM APKK K4         | ViiM APKK K5 | ViiM APKK K22 | ViiM APKK K23 | ViiM APKK K24 | ViiM APKK K25 | ViiM APKK K26 | ViiM APKK K27 | ViiM APKK K28 | ViiM APKK K29 | ViiM APKK K30 | ViiM APKK K31 | ViiM APKK K32 | ViiM APKK K33 | ViiM APKK K34 | ViiM APKK K35 | ViiM APKK K36 | ViiM APKK K37 | ViiM APKK K38 | ViiM APKK K39 | ViiM APKK K40 | ViiM APKK K41 | ViiM APKK K42 | ViiM APKK K43 | ViiM APKK K44 | ViiM APKK K45 | ViiM APKK K46 | ViiM APKK K47 | ViiM APKK K48 | ViiM APKK K49 | ViiM APKK K50 | ViiM APKK K51 | ViiM APKK K52 | ViiM APKK K53 | ViiM APKK K54 | ViiM APKK K55 | ViiM APKK K56 | ViiM APKK K57 | ViiM APKK K58 | ViiM APKK K59 | ViiM APKK K60 | ViiM APKK K61 | ViiM APKK K62 | ViiM APKK K63 | ViiM APKK K64 |
| E. necator treatment | 4h   | 0.36                 | 0.52         | 0.39          | 1.16          | 1.59          | 0.79          | 0.90          | 0.50          | 0.52          | 0.57          | 0.50          | 2.74          | 1.20          | 0.23          | 1.04          | 1.14          | 0.37          | 1.21          | 4.86          | 0.87          | 0.57          | 0.65          | 0.79          | 0.68          | 0.96          | 0.97          | 2.71          | 0.68          | 0.84          | 1.54          | 6.07          | 0.47          | 1.07          | 0.98          | 0.22          | 0.30          | 1.27          | 1.04          | 0.47          | 0.76          | 0.84          | 0.81          | 0.52          | 0.80          | 0.94          |
|                      | 8h   | 0.46                 | 1.42         | 1.07          | 0.81          | 0.67          | 1.01          | 1.07          | 0.86          | 1.07          | 2.08          | 0.95          | 1.87          | 3.93          | 0.71          | 0.46          | 1.04          | 0.80          | 1.50          | 1.76          | 3.31          | 0.66          | 1.32          | 0.96          | 1.27          | 1.31          | 0.96          | 4.05          | 1.21          | 1.07          | 1.35          | 22.15         | 0.60          | 1.20          | 1.08          | 0.30          | 1.44          | 1.06          | 1.30          | 0.87          | 1.16          | 1.83          | 0.97          | 1.19          | 1.26          | 1.75          |
|                      | 12h  | 1.50                 | 0.82         | 0.94          | 1.68          | 0.59          | 2.73          | 3.10          | 1.28          | 0.62          | 1.49          | 0.76          | 2.65          | 7.50          | 1.02          | 1.43          | 1.16          | 1.05          | 1.23          | 2.89          | 2.21          | 0.68          | 1.09          | 1.15          | 1.25          | 2.59          | 1.41          | 3.12          | 1.31          | 2.07          | 2.12          | 9.74          | 0.96          | 1.51          | 1.82          | 1.01          | 1.07          | 1.13          | 0.84          | 0.75          | 1.00          | 3.02          | 1.07          | 1.09          | 0.92          | 2.06          |
|                      | 24h  | 0.46                 | 0.83         | 0.93          | 0.86          | 1.04          | 0.89          | 0.89          | 1.32          | 2.19          | 1.95          | 0.67          | 1.39          | 15.86         | 1.43          | 6.90          | 1.46          | 1.23          | 1.87          | 5.68          | 11.74         | 1.01          | 0.87          | 1.13          | 0.96          | 1.60          | 1.40          | 2.70          | 1.01          | 0.67          | 0.78          | 27.55         | 0.35          | 0.81          | 1.14          | 0.27          | 1.26          | 0.85          | 0.88          | 1.43          | 0.90          | 1.04          | 1.00          | 1.51          | 1.40          | 2.50          |
|                      | 48h  | 0.31                 | 1.78         | 0.29          | 0.46          | 2.25          | 0.66          | 0.95          | 1.54          | 1.82          | 3.28          | 1.57          | 2.59          | 3.11          | 1.39          | 11.91         | 1.57          | 1.19          | 1.43          | 3.34          | 0.89          | 2.35          | 1.05          | 1.54          | 1.53          | 1.16          | 1.30          | 10.97         | 1.57          | 0.43          | 0.85          | 16.56         | 0.20          | 0.66          | 0.57          | 0.17          | 1.23          | 1.24          | 1.25          | 2.79          | 1.14          | 1.41          | 1.78          | 1.85          | 0.89          | 2.67          |
| 72h                  | 0.21 | 0.34                 | 1.10         | 0.95          | 1.26          | 0.62          | 0.77          | 1.46          | 0.64          | 0.44          | 0.82          | 0.90          | 2.12          | 0.34          | 4.63          | 0.65          | 0.87          | 0.91          | 0.75          | 0.46          | 0.52          | 0.56          | 0.75          | 0.59          | 1.29          | 0.88          | 1.28          | 0.83          | 1.00          | 0.82          | 9.93          | 0.44          | 0.73          | 0.54          | 0.31          | 0.46          | 0.87          | 0.56          | 1.13          | 0.95          | 1.13          | 0.60          | 0.67          | 0.36          | 0.59          |               |
|                      |      | ViiM APKK K4         | ViiM APKK K5 | ViiM APKK K22 | ViiM APKK K23 | ViiM APKK K24 | ViiM APKK K25 | ViiM APKK K26 | ViiM APKK K27 | ViiM APKK K28 | ViiM APKK K29 | ViiM APKK K30 | ViiM APKK K31 | ViiM APKK K32 | ViiM APKK K33 | ViiM APKK K34 | ViiM APKK K35 | ViiM APKK K36 | ViiM APKK K37 | ViiM APKK K38 | ViiM APKK K39 | ViiM APKK K40 | ViiM APKK K41 | ViiM APKK K42 | ViiM APKK K43 | ViiM APKK K44 | ViiM APKK K45 | ViiM APKK K46 | ViiM APKK K47 | ViiM APKK K48 | ViiM APKK K49 | ViiM APKK K50 | ViiM APKK K51 | ViiM APKK K52 | ViiM APKK K53 | ViiM APKK K54 | ViiM APKK K55 | ViiM APKK K56 | ViiM APKK K57 | ViiM APKK K58 | ViiM APKK K59 | ViiM APKK K60 | ViiM APKK K61 | ViiM APKK K62 | ViiM APKK K63 | ViiM APKK K64 |
| SA treatment         | 4h   | 0.66                 | 0.83         | 1.00          | 1.26          | 1.66          | 2.06          | 0.63          | 0.90          | 2.44          | 0.60          | 0.40          | 3.38          | 0.40          | 0.57          | 0.11          | 2.21          | 0.31          | 0.60          | 5.35          | 0.11          | 0.48          | 0.53          | 0.85          | 0.52          | 0.63          | 0.71          | 0.40          | 0.63          | 0.96          | 1.15          | 0.48          | 0.41          | 3.56          | 1.44          | 0.63          | 0.68          | 0.77          | 0.86          | 0.62          | 0.93          | 1.14          | 0.66          | 0.78          | 0.78          | 1.62          |
|                      | 8h   | 1.01                 | 1.09         | 1.40          | 0.48          | 0.77          | 2.17          | 0.73          | 0.92          | 1.65          | 2.09          | 0.80          | 1.28          | 0.88          | 1.42          | 0.07          | 2.64          | 0.64          | 0.56          | 1.09          | 3.13          | 0.63          | 1.05          | 0.29          | 0.34          | 0.77          | 1.02          | 0.09          | 1.45          | 1.39          | 1.18          | 3.14          | 0.74          | 2.15          | 0.95          | 0.74          | 0.62          | 0.77          | 0.89          | 0.96          | 0.87          | 2.75          | 0.73          | 0.57          | 1.33          | 0.80          |
|                      | 12h  | 0.64                 | 1.60         | 1.47          | 1.09          | 1.56          | 1.60          | 0.89          | 2.99          | 1.30          | 2.21          | 0.76          | 1.95          | 1.83          | 1.15          | 0.05          | 2.50          | 0.44          | 0.70          | 1.73          | 0.37          | 0.52          | 1.56          | 1.34          | 0.75          | 1.29          | 1.05          | 0.05          | 0.76          | 1.00          | 1.28          | 1.90          | 0.37          | 2.41          | 1.56          | 1.34          | 1.04          | 1.02          | 1.37          | 1.47          | 1.04          | 5.15          | 0.80          | 1.39          | 1.44          | 9.48          |
|                      | 24h  | 0.62                 | 1.81         | 1.67          | 0.70          | 0.41          | 2.00          | 0.74          | 1.39          | 2.13          | 2.83          | 0.59          | 1.13          | 4.40          | 1.68          | 2.80          | 1.75          | 0.40          | 1.02          | 4.01          | 2.22          | 0.89          | 0.87          | 1.21          | 0.92          | 0.95          | 1.01          | 0.15          | 0.64          | 0.87          | 1.04          | 0.71          | 0.52          | 1.16          | 1.05          | 1.10          | 1.34          | 1.13          | 1.18          | 1.19          | 0.59          | 2.10          | 1.00          | 1.51          | 1.40          | 2.50          |
|                      | 48h  | 0.56                 | 1.52         | 0.58          | 0.64          | 2.37          | 0.92          | 0.79          | 1.00          | 0.96          | 2.86          | 1.55          | 1.99          | 1.34          | 1.44          | 8.53          | 1.37          | 0.46          | 1.45          | 1.44          | 2.73          | 1.24          | 0.83          | 1.09          | 1.09          | 1.04          | 1.11          | 2.58          | 1.07          | 0.49          | 0.94          | 6.15          | 0.36          | 0.76          | 0.85          | 0.38          | 0.62          | 1.11          | 0.94          | 1.67          | 0.91          | 1.54          | 0.96          | 1.03          | 0.53          | 1.91          |
| 72h                  | 0.42 | 0.95                 | 2.25         | 1.35          | 4.39          | 1.46          | 1.00          | 0.86          | 0.75          | 1.55          | 1.13          | 1.35          | 0.85          | 0.62          | 1.55          | 0.88          | 1.03          | 1.07          | 0.45          | 0.55          | 1.33          | 0.98          | 1.26          | 1.16          | 0.55          | 1.76          | 0.14          | 1.19          | 1.53          | 1.95          | 0.57          | 0.96          | 1.02          | 1.24          | 1.50          | 0.99          | 1.24          | 1.00          | 0.71          | 1.00          | 1.14          | 1.23          | 1.24          | 1.23          | 1.01          |               |
|                      |      | ViiM APKK K4         | ViiM APKK K5 | ViiM APKK K22 | ViiM APKK K23 | ViiM APKK K24 | ViiM APKK K25 | ViiM APKK K26 | ViiM APKK K27 | ViiM APKK K28 | ViiM APKK K29 | ViiM APKK K30 | ViiM APKK K31 | ViiM APKK K32 | ViiM APKK K33 | ViiM APKK K34 | ViiM APKK K35 | ViiM APKK K36 | ViiM APKK K37 | ViiM APKK K38 | ViiM APKK K39 | ViiM APKK K40 | ViiM APKK K41 | ViiM APKK K42 | ViiM APKK K43 | ViiM APKK K44 | ViiM APKK K45 | ViiM APKK K46 | ViiM APKK K47 | ViiM APKK K48 | ViiM APKK K49 | ViiM APKK K50 | ViiM APKK K51 | ViiM APKK K52 | ViiM APKK K53 | ViiM APKK K54 | ViiM APKK K55 | ViiM APKK K56 | ViiM APKK K57 | ViiM APKK K58 | ViiM APKK K59 | ViiM APKK K60 | ViiM APKK K61 | ViiM APKK K62 | ViiM APKK K63 | ViiM APKK K64 |
| ETH treatment        | 4h   | 0.63                 | 0.56         | 1.77          | 2.98          | 2.65          | 1.54          | 0.55          | 0.45          | 0.58          | 0.35          | 0.39          | 2.69          | 0.69          | 0.31          | 1.18          | 1.28          | 0.28          | 0.70          | 1.96          | 0.90          | 0.54          | 0.71          | 0.80          | 0.67          | 2.26          | 0.58          | 1.09          | 0.46          | 0.72          | 1.00          | 0.57          | 0.62          | 1.71          | 0.69          | 0.59          | 0.42          | 1.12          | 1.11          | 0.40          | 0.58          | 1.22          | 0.62          | 0.72          | 0.59          | 2.92          |
|                      | 8h   | 1.55                 | 1.54         | 5.84          | 3.73          | 4.98          | 2.25          | 1.64          | 1.06          | 1.30          | 1.22          | 0.51          | 1.75          | 1.17          | 0.53          | 4.02          | 2.33          | 0.35          | 1.37          | 0.61          | 17.39         | 0.97          | 1.13          | 1.07          | 1.20          | 5.51          | 0.93          | 3.44          | 0.76          | 1.60          | 2.08          | 2.53          | 1.96          | 5.38          | 0.97          | 2.31          | 1.00          | 1.25          | 1.57          | 1.08          | 0.81          | 6.32          | 0.80          | 1.39          | 0.88          | 9.87          |
|                      | 12h  | 1.26                 | 0.95         | 4.03          | 2.89          | 1.02          | 1.74          | 1.19          | 0.92          | 1.19          | 0.41          | 0.25          | 0.95          | 2.31          | 0.63          | 1.14          | 1.43          | 0.22          | 0.33          | 0.34          | 1.26          | 0.56          | 1.28          | 1.34          | 1.02          | 2.28          | 0.99          | 0.51          | 0.51          | 1.43          | 1.39          | 0.98          | 0.86          | 4.07          | 1.61          | 2.12          | 0.62          | 1.32          | 1.83          | 0.89          | 1.07          | 9.43          | 0.78          | 1.20          | 0.99          | 6.28          |
|                      | 24h  | 0.62                 | 0.75         | 2.72          | 1.40          | 1.04          | 1.76          | 0.79          | 0.56          | 1.53          | 0.89          | 0.40          | 0.69          | 5.69          | 0.86          | 4.24          | 2.07          | 0.45          | 1.04          | 2.06          | 12.30         | 0.98          | 1.01          | 0.89          | 0.69          | 1.05          | 1.04          | 1.44          | 0.68          | 0.54          | 0.84          | 2.02          | 0.84          | 1.70          | 0.79          | 1.47          | 1.38          | 1.13          | 1.42          | 0.90          | 0.58          | 0.72          | 1.11          | 1.00          | 3.68          |               |
|                      | 48h  | 0.72                 | 0.82         | 1.25          | 1.02          | 1.52          | 1.18          | 0.95          | 0.76          | 1.30          | 1.12          | 0.68          | 0.88          | 0.63          | 0.91          | 5.30          | 1.32          | 0.26          | 1.17          | 0.55          | 5.67          | 0.82          | 0.82          | 1.01          | 0.89          | 1.08          | 0.72          | 7.31          | 0.83          | 0.42          | 0.80          | 1.52          | 0.59          | 1.59          | 0.67          | 0.54          | 0.83          | 1.16          | 1.59          | 1.66          | 0.72          | 2.19          | 0.85          | 1.26          | 0.56          | 4.73          |
| 72h                  | 0.71 | 0.94                 | 4.75         | 4.06          | 1.66          | 1.90          | 1.51          | 1.61          | 1.06          | 1.25          | 0.95          | 0.22          | 0.89          | 0.80          | 7.30          | 0.83          | 0.86          | 0.60          | 0.22          | 1.33          | 1.61          | 1.12          | 1.02          | 1.11          | 1.32          | 1.45          | 1.16          | 0.56          | 1.33          | 1.44          | 0.60          | 1.62          | 2.24          | 1.20          | 2.27          | 1.08          | 1.38          | 1.06          | 1.69          | 0.80          | 0.62          | 0.94          | 1.46          | 0.50          | 4.03          |               |
|                      |      | ViiM APKK K4         | ViiM APKK K5 | ViiM APKK K22 | ViiM APKK K23 | ViiM APKK K24 | ViiM APKK K25 | ViiM APKK K26 | ViiM APKK K27 | ViiM APKK K28 | ViiM APKK K29 | ViiM APKK K30 | ViiM APKK K31 | ViiM APKK K32 | ViiM APKK K33 | ViiM APKK K34 | ViiM APKK K35 | ViiM APKK K36 | ViiM APKK K37 | ViiM APKK K38 | ViiM APKK K39 | ViiM APKK K40 | ViiM APKK K41 | ViiM APKK K42 | ViiM APKK K43 | ViiM APKK K44 | ViiM APKK K45 | ViiM APKK K46 | ViiM APKK K47 | ViiM APKK K48 | ViiM APKK K49 | ViiM APKK K50 | ViiM APKK K51 | ViiM APKK K52 | ViiM APKK K53 | ViiM APKK K54 | ViiM APKK K55 | ViiM APKK K56 | ViiM APKK K57 | ViiM APKK K58 | ViiM APKK K59 | ViiM APKK K60 | ViiM APKK K61 | ViiM APKK K62 | ViiM APKK K63 | ViiM APKK K64 |
| H2O2 Treatment       | 4h   | 0.62                 | 1.92         | 1.33          | 1.85          | 2.02          | 1.23          | 0.84          | 0.84          | 0.67          | 0.18          | 0.79          | 3.83          | 1.04          | 0.65          | 4.76          | 1.25          | 0.66          | 1.84          | 6.01          | 4.03          | 0.99          | 0.96          | 0.92          | 1.04          | 1.92          | 1.09          | 2.95          | 0.63          | 1.18          | 2.11          | 1.44          | 0.39          | 2.93          | 1.03          | 0.24          | 0.52          | 1.03          | 1.12          | 0.71          | 0.85          | 0.66          | 0.94          | 0.80          | 0.77          | 1.68          |
|                      | 8h   | 0.99                 | 1.50         | 1.83          | 2.18          | 1.47          | 1.21          | 1.11          | 0.84          | 0.86          | 0.82          | 1.20          | 0.53          | 0.87          | 0.77          | 4.41          | 1.48          | 1.22          | 2.01          | 1.42          | 24.93         | 0.60          | 1.00          | 1.37          | 1.18          | 2.99          | 0.98          | 3.66          | 1.07          | 1.13          | 1.77          | 1.37          | 0.65          | 2.59          | 1.11          | 0.32          | 1.11          | 0.88          | 0.99          | 0.88          | 0.99          | 0.61          | 1.06          | 1.19          | 0.83          | 1.23          |
|                      | 12h  | 0.85                 | 1.89         | 1.86          | 4.24          | 0.33          | 1.03          | 1.09          | 1.60          | 0.96          | 1.49          | 0.93          | 1.24          | 1.77          | 0.94          | 2.64          | 1.40          | 1.48          | 1.21          | 1.99          | 6.22          | 0.62          | 1.32          | 1.23          | 1.46          | 2.53          | 1.24          | 1.05          | 0.81          | 1.56          | 2.40          | 6.74          | 0.57          | 2.56          | 1.30          | 0.52          | 1.27          | 0.97          | 0.84          | 1.90          | 0.98          | 4.61          | 1.11          | 0.92          | 0.77          | 2.25          |
|                      | 24h  | 0.69                 | 1.36         | 2.93          | 3.06          | 0.47          | 1.47          | 1.13          | 0.98          | 2.32          | 2.71          | 0.74          | 2.00          | 7.39          | 1.14          | 43.93         | 2.22          | 2.03          | 1.65          | 5.23          | 53.94         | 0.91          | 1.29          | 1.09          | 1.29          | 0.87          | 1.33          | 2.35          | 1.08          | 0.81          | 1.86          | 4.06          | 0.58          | 2.34          | 1.42          | 0.30          | 1.52          | 1.14          | 1.26          | 1.81          | 0.73          | 2.47          | 1.21          | 1.25          | 1.51          | 3.00          |
|                      | 48h  | 0.56                 | 1.62         | 1.35          | 3.10          | 0.74          | 0.90          | 0.85          | 0.87          | 1.67          | 1.88          | 1.06          | 1.65          | 0.89          | 1.10          | 15.57         | 0.44          | 1.92          | 1.42          | 0.76          | 4.68          | 1.52          | 1.26          | 0.84          | 1.82          | 1.16          | 1.38          | 9.64          | 0.32          | 0.91          | 1.58          | 3.15          | 0.48          | 1.94          | 1.00          | 0.20          | 1.09          | 0.99          | 1.09          | 1.42          | 0.62          | 0.55          | 1.39          | 1.49          | 0.78          | 3.00          |
| 72h                  | 0.35 | 0.40                 | 1.58         | 3.04          | 0.59          | 0.74          | 0.49          | 0.51          | 0.39          | 0.30          | 0.65          | 0.51          | 0.56          | 0.30          | 6.54          | 0.44          | 0.82          | 0.74          | 0.30          | 3.77          | 0.54          | 0.59          | 0.83          | 0.88          | 1.02          | 0.93          | 1.29          | 0.49          | 0.75          | 0.95          | 2.70          | 0.43          | 0.91          | 0.71          | 0.20          | 0.47          | 0.72          | 0.62          | 0.40          | 0.63          | 0.14          | 0.94          | 0.75          | 0.61          | 0.52          |               |
|                      |      | ViiM APKK K4         | ViiM APKK K5 | ViiM APKK K22 | ViiM APKK K23 | ViiM APKK K24 | ViiM APKK K25 |               |               |               |               |               |               |               |               |               |               |               |               |               |               |               |               |               |               |               |               |               |               |               |               |               |               |               |               |               |               |               |               |               |               |               |               |               |               |               |
