# Supplementary material for: Genome-wide identification and analysis of mitogen activated protein kinase kinase kinase gene family in grapevine (Vitis vinifera)
Source: BMC Plant Biol. 2014 Aug 27;14:219. doi: 10.1186/s12870-014-0219-1 (PMC4243721; doi:10.1186/s12870-014-0219-1)
Supplement: Additional file 3: Table S2. — The number of introns of VviMAPKKK genes. [file 12870_2014_219_MOESM3_ESM.pdf]

|   |             | G(T/S)Px(W/Y/F)MAPEV                                                                                          |  |
|---|-------------|---------------------------------------------------------------------------------------------------------------|--|
| A | AtMAPKKK5   | EVVHFGSINKYIRDHCG---TMTESVVRNPTRRHIDPSGLALE-NKKTVERDIRGAILLNDAS-GVVKLADFGMAHILT-----GQRADLSIRGSPFWMAPEVQAVM   |  |
|   | VviMAPKKK28 | ELAPEGSILNLYRKHK---LLEPQNSVETRCIIPNGISALE-GKHVIERDVRGAILNFEN-HIVKLADFGLSVVSF-----ISRVTISFRGSPFWMAPEVFN---     |  |
|   | VviMAPKKK27 | BLVTGCSILSLYQKYH---LQSSQASVYTRCIIPNGIKYLE-EQNVVERDIRGAILNDVH-GSVKIADFGIARATK-----LNDVK-SQGTPEFWMAPEVFNWKN     |  |
|   | AtMAPKKK8   | BLVTGCSILSLYQRYQ---LRDSVYSLVTRCIIPNGIKYLE-DKGFIERDIRGAILNDAN-GAVKLADFGIARVSK-----FNDIK-SQGTPEFWMAPEVFNRR--    |  |
|   | VviMAPKKK24 | EVVHFGSINKYV-DHFG---AMTSVVRNPTRRHIDPSGLALE-STKTIERDIRGAILLDSF-GVVKLADFGIARFLT-----GQACDLSIRGSPFWMAPEVQAVL     |  |
|   | VviMAPKKK5  | EVVHFGSINKYVREHCG---ATTESVVRNPTRRHIDPSGLALE-STKTIERDIRGAILLNDAS-GVVKLADFGMSHILT-----GAAADLSIRGSPFWMAPEVQAVM   |  |
|   | AtMAPKKK9   | BLVTGCSILSLYRRYQ---IRDSLSLVTTCIIPNGIKYLE-HKGFIERDIRGAILNDAN-GTVKLADFGIARVSK-----LNDIK-SRREGLFWMAPEVFNRR--     |  |
|   | AtMAPKKK10  | BLVTGCSVQRLYERYQ---LSYTVVSLVTRCIIPNGIKYLE-DKGFIERDIRGAILLNDAN-GTVKLADFGIARVMS-----LWRTF-YWN-----WMAPEVFNLP-   |  |
|   | AtMAPKKK1   | EVVPGCSISLLLEKF---GAPFESVVRTTQCLILGLEYLE-NHAIMERDIRGAILNDNK-GC KLADFGASQVA-ELATMTGAKSMRGTFWMAPEVQLQTG         |  |
|   | AtMAPKKK2   | EVVPGCSISLLLEKF---GAPFESVVRTTQCLILGLEYLE-NHAIMERDIRGAILNDNQ-GC KLADFGASQVA-ELATISGAKSMRGTFWMAPEVQLQTG         |  |
|   | AtMAPKKK17  | EVAPYCTIDAAAKD---GGRVDTRVVKTRCIIPNGIKYLE-HSKGIVRCDVRGSAVVISEK-GEAKIADFGCARVD-----PVFESFVNGTFWMAPEVARGEK       |  |
|   | AtMAPKKK14  | EVSPFESVAN-----GGIVNLTIRRVVWCLVSLSHVE-SNGIVRCDVRGSAVVISEK-VLFNGGSSVKLADFGSAVEFE-----KSTIHVSFRGSPFWMAPEVFRREY  |  |
|   | AtMAPKKK3   | EVVSGCSIHKLKDYG---SFTDPVVCNVTQCLILGLEYLE-GRNTVERDIRGAILNDPN-GE KLADFGMAHVT-----AFSTMLSPRGSPFWMAPEVMSQN        |  |
|   | AtMAPKKK6   | EVVNGSIANIIPKNK-FGPFPSLAVTIAQVVEGLVYLE-EQGVIERDIRGAILITTK-CLVKLADFGVATKLN---EADFNTHSVVGTPEFWMAPEVELSG         |  |
|   | AtMAPKKK7   | EVVNGSIANIIPKNK-FGPFPSLAVTIAQVVEGLVYLE-EQGVIERDIRGAILITTK-CLVKLADFGVATKLN---EADFNTHSVVGTPEFWMAPEVELMSG        |  |
|   | AtMAPKKK15  | EVVSGCSIHDLKNS---GGKLPPELRSVTRCIIPNGIKYLE-DQGVIRCDVRGSAVVISG-G-EIAKIIVRLCAHVTVE-----ENENLEFSGTFWMAPEVSPVARGEK |  |
|   | AtMAPKKK19  | EVASRGSIESYLKKA-GEGVPESTVRRHSGSVIRGLRH-HANGFAHCDIQLANILLFGD-GAVKIADFGIARIG-DLTALNNGVQIRGTPEFWMAPEVNDNE        |  |
|   | VviMAPKKK22 | EVVPGCSISLLLGKF---GSFPEAVRMVTKCLILGLEYLE-NNGIEMERDIRGAILNDNK-GC KLADFGASQVV-ELATISGAKSMRGTFWMAPEVQLQTG        |  |
|   | VviMAPKKK16 | EVVSGCSIHDLKNS---GGKLPPELRSVTRCIIPNGIKYLE-ERGIVRCDVRSVILVEEN-GVVKIADFGASQVD-----RS---EFGSGTFWMAPEVARGEK       |  |
|   | VviMAPKKK23 | EVVPGCSISLLLGKF---GSFPEAVRMVTKCLILGLEYLE-KNGIEMERDIRGAILNDNK-GC KLADFGASQVV-ELATMTGAKSMRGTFWMAPEVQLQTG        |  |
|   | AtMAPKKK20  | EVASRGSIASYMKKL-GEGLPESTVRRHSGSVIRGLRH-HANGFAHCDIQLANILLFGD-GSVKIADFGIARVVDGDLTALRKSVEIGTFWMAPEVNDNE          |  |
|   | AtMAPKKK12  | EVASGCSIASYMKKS---GEALPEFVRRTSRIIVKLCIHH-NGGFTHCODIKLEHNVILFGD-CLVKISDFGLARRS-----GEVCVEIGTFWMAPEVNHGE        |  |
|   | AtMAPKKK12  | EVVPGCSISLLLEKF---GSFPEAVRMVTKCLILGLEYLE-NNGIEMERDIRGAILNDNK-GC KLADFGASQVV-ELATVNGAKSMRGTFWMAPEVQLQTG        |  |
|   | AtMAPKKK18  | EVAPYCTIDVATKN---GGFIDARVVKTRCIIPNGIKYLE-HSKGIVRCDVRGSAVVISEK-GEAKIADFGCAWVE-----PETTEPVRRGTFWMAPEVARGEK      |  |
|   | AtMAPKKK13  | EVLPNGTIDASH---RAG-GKIEDTTLQPTACLVSLSHVE-SQGVIRCDVRGSAVVISEK-SM KLADFGSAFRH-----TPRALITPRGSPFWMAPEVFRREY      |  |
|   | VviMAPKKK4  | EVVSGCSIYKLLQFYG---CLGSIARSTQCLILGLEYLE-AKNTVERDIRGAILNDPN-GE KLADFGMAHIT-----GQSCFSLRGSPFWMAPEVFNKSN         |  |
|   | VviMAPKKK26 | EVVSGCSIYKLLQFYG---CLGSIARSTQCLILGLEYLE-AKNTVERDIRGAILNDPN-GE KLADFGMAHIT-----GQSCFSLRGSPFWMAPEVFNKSN         |  |
|   | AtMAPKKK4   | EVVSGCSIYKLLQFYG---CFGNARNTQCLILGLEYLE-AKNTVERDIRGAILNDPN-GEKVADFGMAHIT-----AQSGFSLRGSPFWMAPEVFNKSN           |  |
|   | VviMAPKKK25 | EVVSGCSIHKLQFYG---PFRPEVVCNARCIIPNGIKYLE-GRSTVERDIRGAILNDPN-GE KLADFGMAHIN-----SSSSMLSPRGSPFWMAPEVFNMTN       |  |
|   |             | GTPEFWMAPE(L/V)Y                                                                                              |  |
| B | VviMAPKKK33 | NINFTITEFTSGSLRCYRKHHREVDLRAIKRWSROIILGILYLSHEDPFIHRDLKCNIFVNGNGGVVKIGDGLAATIRGARSASHSVIGTPEFWMAPELYSEVY      |  |
|   | AtZIK2      | TINITEFTSGSLRCYRKHYREVDLRAIKRWSROIILGILYLSHEDPFIHRDLKCNIFVNGNGGVVKIGDGLAATIRGARSASHSVIGTPEFWMAPELYSEVY        |  |
|   | VviMAPKKK37 | NINFTVEMETSGSLRCYRKHREVNIRAVRWKROIILGILYLSHEDPFIHRDLKCNIFVNGNGGVVKIGDGLAATIRKS-PAAHQVGTPEFWMAPEVYSEVY         |  |
|   | AtZIK4      | NINFTVEMETSGSLRCYRKHREVNIRAVRWKROIILGILYLSHEDPFIHRDLKCNIFVNGNGGVVKIGDGLAATIRKS-PAAHQVGTPEFWMAPEVYSEVY         |  |
|   | AtZIK6      | TINITEFTSGSLRCYRKHREVDLRAIKRWSROIILGILYLSHEDPFIHRDLKCNIFVNGNGGVVKIGDGLAATIRGARSASHSVIGTPEFWMAPELYSEVY         |  |
|   | VviMAPKKK34 | TINITEFTSGSLRCYRKHREVDLRAIKRWSROIILGILYLSHEDPFIHRDLKCNIFVNGNGGVVKIGDGLAATIRGARSASHSVIGTPEFWMAPELYSEVY         |  |
|   | VviMAPKKK36 | TEINISEMETSGSLRCYRKHYREVDLRAIKRWSROIILGILYLSHEDPFIHRDLKCNIFVNGNGGVVKIGDGLAATIRGARSASHSVIGTPEFWMAPELYSEVY      |  |
|   | AtZIK11     | TINITEFTSGSLRCYRKHREVDLRAIKRWSROIILGILYLSHEDPFIHRDLKCNIFVNGNGGVVKIGDGLAATIRGARSASHSVIGTPEFWMAPELYSEVY         |  |
|   | AtZIK8      | TINITEFTSGSLRCYRKHREVDLRAIKRWSROIILGILYLSHEDPFIHRDLKCNIFVNGNGGVVKIGDGLAATIRGARSASHSVIGTPEFWMAPELYSEVY         |  |
|   | AtZIK9      | NINFTVEMETSGSLRCYRKHREVNIRAVRWKROIILGILYLSHEDPFIHRDLKCNIFVNGNGGVVKIGDGLAATIRKS-PAAHQVGTPEFWMAPEVYSEVY         |  |
|   | AtZIK10     | NINFTVEMETSGSLRCYRKHREVNIRAVRWKROIILGILYLSHEDPFIHRDLKCNIFVNGNGGVVKIGDGLAATIRKS-PAAHQVGTPEFWMAPEVYSEVY         |  |
|   | AtZIK1      | TEINITEFTSGSLRCYRKHYREVDLRAIKRWSROIILGILYLSHEDPFIHRDLKCNIFVNGNGGVVKIGDGLAATIRGARSASHSVIGTPEFWMAPELYSEVY       |  |
|   | AtZIK5      | TVINITEFTSGSLRCYRKHREVDLRAIKRWSROIILGILYLSHEDPFIHRDLKCNIFVNGNGGVVKIGDGLAATIRGARSASHSVIGTPEFWMAPELYSEVY        |  |
|   | VviMAPKKK35 | TEINITEFTSGSLRCYRKHYREVDLRAIKRWSROIILGILYLSHEDPFIHRDLKCNIFVNGNGGVVKIGDGLAATIRGARSASHSVIGTPEFWMAPELYSEVY       |  |
|   | VviMAPKKK31 | TVINITEFTSGSLRCYRKHREVDLRAIKRWSROIILGILYLSHEDPFIHRDLKCNIFVNGNGGVVKIGDGLAATIRGARSASHSVIGTPEFWMAPELYSEVY        |  |
|   | VviMAPKKK30 | TVINITEFTSGSLRCYRKHREVDLRAIKRWSROIILGILYLSHEDPFIHRDLKCNIFVNGNGGVVKIGDGLAATIRGARSASHSVIGTPEFWMAPELYSEVY        |  |
|   | VviMAPKKK32 | TVINITEFTSGSLRCYRKHREVDLRAIKRWSROIILGILYLSHEDPFIHRDLKCNIFVNGNGGVVKIGDGLAATIRGARSASHSVIGTPEFWMAPELYSEVY        |  |
|   | AtZIK7      | TVINITEFTSGSLRCYRKHREVDLRAIKRWSROIILGILYLSHEDPFIHRDLKCNIFVNGNGGVVKIGDGLAATIRGARSASHSVIGTPEFWMAPELYSEVY        |  |
